# Supplementary material
Source: Springer Nature journal article supplement (https://www.springermedizin.de/resource/supplementary/12931_2010_1065_MOESM3_ESM.pdf/9425556)
Supplement: MOESM3 [file 9425556]

A) BUD/FORM maintenance and reliever therapy vs. higher maintenance dose ICS + SABA

GINA Step 2

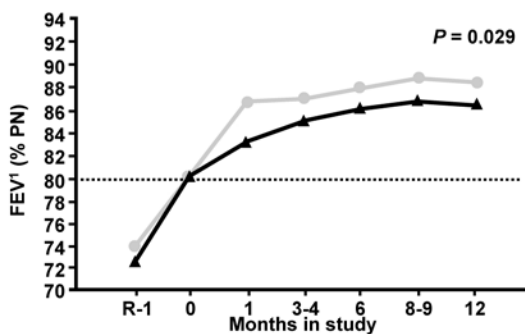

GINA Step 3

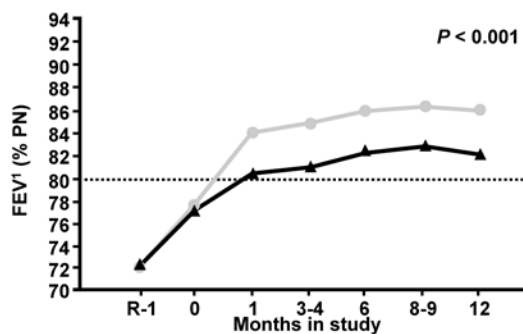

GINA Step 4

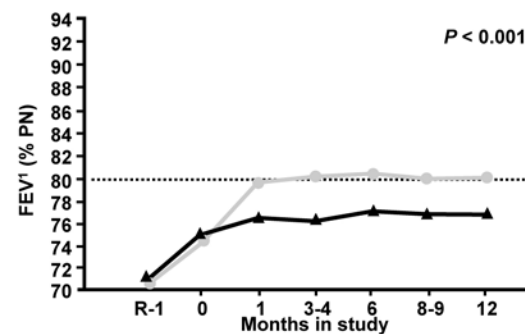

B) BUD/FORM maintenance and reliever therapy vs. same maintenance dose ICS/LABA + SABA

GINA Step 2

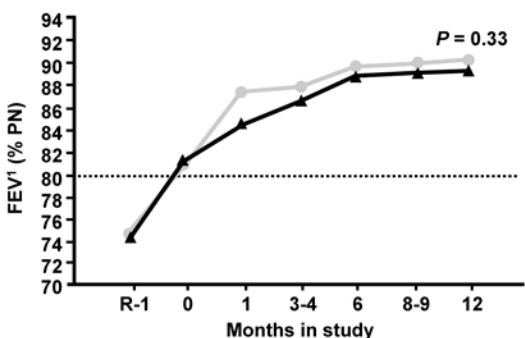

GINA Step 3

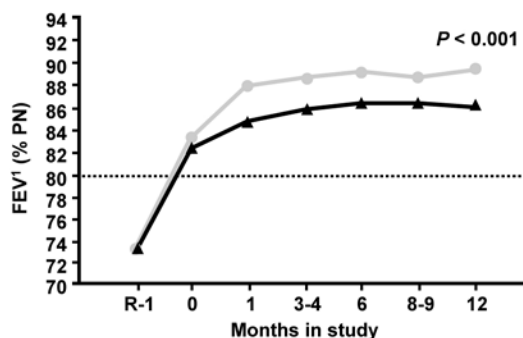

GINA Step 4

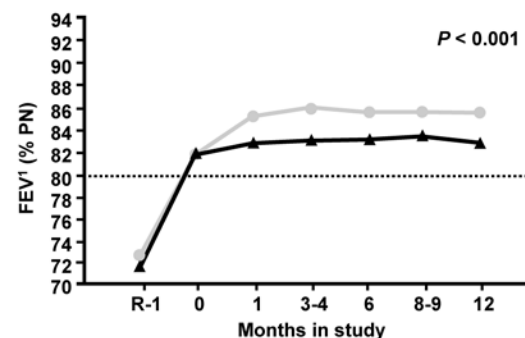

C) BUD/FORM maintenance and reliever therapy vs. higher maintenance dose ICS/LABA + SABA

GINA Step 3

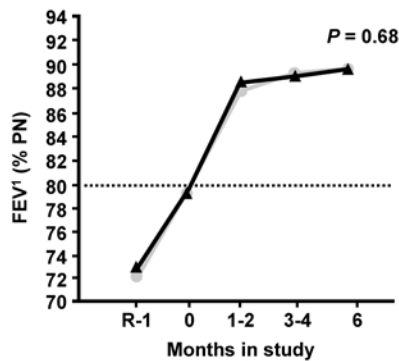

GINA Step 4

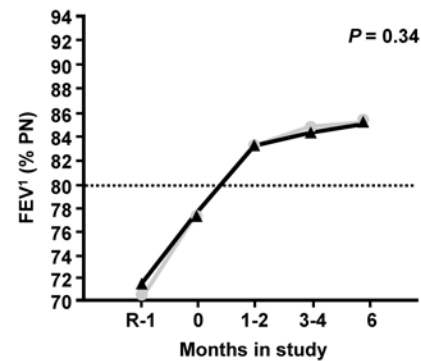

● BUD/FORM maintenance and reliever therapy  
▲ Comparator
